# Supplementary material for: Quantum algorithm for alchemical optimization in material design
Source: Royal Society of Chemistry journal article supplement (doi:10.1039/d0sc05718e), 2021-01-01
Supplement: d0sc05718e1.pdf [file d0sc05718e1.pdf]

## Supplementary information for the article: Quantum algorithm for alchemical optimization in material design

Panagiotis Kl. Barkoutsos, Fotios Gkritis, Pauline J. Ollitrault, Igor O. Sokolov, Stefan Woerner, and Ivano Tavernelli

(Dated: January 20, 2021)

### Molecular Systems

For this case we consider that all molecular systems are of fixed interatomic distance. The distances between the points are recorded in Table SI-1.

TABLE SI-1. Interatomic distances for all considered molecules in vacuum. All distances are taken from ref.<sup>1</sup> (ref. [29] of the main text) where they were computed at CCSD(T)/cc-pVQZ level of theory.

| Molecule        | Distance (Å) |
|-----------------|--------------|
| H <sub>2</sub>  | 0.742        |
| LiH             | 1.607        |
| Li <sub>2</sub> | 2.698        |
| LiNa            | 2.950        |
| Na <sub>2</sub> | 3.177        |
| NaH             | 1.926        |

Additional constrains on the construction of the ‘alchemical’ Hamiltonian can be implemented to choose certain molecular structures without further requirements in terms of quantum resources.

For the second case study we consider all possible combinations of molecules comprised by the atoms *C, N, O* and *S*. The equilibrium bond distances of the different molecules considered are summarized in Table SI-2. The orientation of the molecule is does not play a significant role, since it only has a minor effect (less than 0.1 %) on the binding energies (according to calculations executed on classical quantum chemistry drivers). To this extend we align all molecules along the *z*-axis, according to the atomic coordinates stated in Table SI-2.

TABLE SI-2. Interatomic distances of all heteroatomic molecules composed by the atoms in the set {*C, N, O, S*}. All values are in Å.

| Molecule | Distance | Atom 1 & 2 |        | Atom 1 | Atom 2 |
|----------|----------|------------|--------|--------|--------|
|          |          | x          | y      | z      | z      |
| CN       | 1.226    | 17.177     | 18.731 | 72.948 | 74.174 |
| OC       | 1.182    | 17.177     | 18.731 | 73.085 | 74.267 |
| ON       | 1.169    | 17.177     | 18.731 | 72.991 | 74.160 |
| SC       | 1.559    | 17.177     | 18.731 | 72.881 | 74.440 |
| SN       | 1.604    | 17.177     | 18.731 | 72.849 | 74.453 |
| SO       | 1.634    | 17.177     | 18.731 | 72.823 | 74.457 |

### The ‘alchemical’ Hamiltonian

The contributions to the ‘alchemical’ Hamiltonian (Eq.(1) of the main text) that drives the optimization in the chemical space are:

$$K_e(r) = -\frac{\hbar^2}{2m_e} \sum_i^{N_e} \nabla_{r_i}^2 \quad (\text{SI-1})$$

$$V_{en}(\tilde{Z}_I^{s_I}, r_i, R_I) = -\frac{e^2 \tilde{Z}_I^{s_I}}{4\pi\epsilon_0 |R_I - r_i|} \quad (\text{SI-2})$$

$$V_{nn}(\tilde{Z}^s, R) = \sum_{I=1}^{N_n} \sum_{J>I}^{N_n} \sum_{S_I} \sum_{S_J} \alpha_{S_I}^I \alpha_{S_J}^J \frac{e^2 \tilde{Z}_I^{s_I} \tilde{Z}_J^{s_J}}{4\pi\epsilon_0 |R_I - R_J|} \quad (\text{SI-3})$$

$$V_{ee}(r) = \sum_{i=1}^{N_e} \sum_{j>i}^{N_e} \frac{e^2}{4\pi\epsilon_0 |r_i - r_j|} \quad (\text{SI-4})$$

where  $\epsilon_0$  is the permittivity and  $e$  is the electron charge. For all atoms heavier than H we use the effective core potentials given in Table SI-3 as implemented in the Gaussian software package.<sup>2</sup> The calculation of the classical term in Eq.(3) scales as  $N_n^2 \times N_s^2$  and therefore will never influence the scaling of the alchemical algorithm, which achieves the reduction from an exponential scaling (in the number of basis functions for the sampling of the chemical space and of the many-electron Hilbert space) to a polynomial one.

The one- and two-electron integrals in the second quantized Hamiltonian (Eq.(4) of the main text) are given by

$$h_{\mu\nu}(\tilde{Z}_I^{s_I}, R_I) = \int dr \phi_{\mu}^{AO*}(R_I, r) \left( -\frac{1}{2} \nabla_r^2 - \sum_{I=1}^M \frac{e^2 \tilde{Z}_I^{s_I}}{R_{1I}} \right) \phi_{\nu}^{AO}(R_I, r) \quad (\text{SI-5})$$

and

$$g_{\mu\nu\kappa\lambda}(R, r) = \int dr_1 dr_2 \phi_{\mu}^{AO*}(R_I, r_1) \phi_{\nu}^{AO*}(R_J, r_2) \frac{e^2}{r_{12}} \phi_{\lambda}^{AO}(R_K, r_1) \phi_{\kappa}^{AO}(R_L, r_2) \quad (\text{SI-6})$$

where  $R_{1I} = 4\pi\epsilon_0 |R_I - r_1|$ , and  $r_{12} = 4\pi\epsilon_0 |r_1 - r_2|$  and  $\phi_{\mu}^{AO}(R_I, r_1)$  is the atomic STO-3G basis function  $\mu$  of the atom at position  $R_I$  and valence charge  $\tilde{Z}_I^{s_I}$  (see main text). All integrals are computed using the Gaussian code.<sup>2</sup>

For example, the calculation of the one-body integrals for the ‘alchemical’ Hamiltonian in a fixed molecular scaffold defined by the  $N_A$  coordinates  $\{R_I\}$  and  $N_{S_I}$  possible species for each atom  $I$  is given by

$$h_{\mu\nu}^C(\tilde{Z}, R) = - \sum_{\substack{K \neq I \\ L \neq K, I \\ \mu, \nu}}^{N_A, N_A, N_{AO}^{\text{MAX}}} \sum_{I=1}^{N_A} \sum_{\alpha=1}^{N_S^{\text{MAX}}} Z_I^{\alpha} \langle \phi_{\mu}^{AO}(R_K, r) | \frac{e^2}{|R_I - r|} | \phi_{\nu}^{AO}(R_L, r) \rangle \quad (\text{SI-7})$$

where  $N_S^{\text{MAX}} = \max\{N_{S_1}, \dots, N_{S_{N_A}}\}$ ,  $\tilde{Z}$  is the ensemble of all  $\tilde{Z}_I^{s_I}$ , and  $R$  the one of all nuclear positions. The classical cost of this operation scales as  $\mathcal{O}(N_A^2 N_{AO}^2) \mathcal{O}(N_A) \mathcal{O}(N_S^{\text{MAX}})$ . Note that, when the number of valence electrons for the different atoms in the alchemical set (i.e., the pool of atoms used for the alchemical changes) differ, we could enforce for all atoms the same number of valence states (and therefore qubits) using dummy (or empty) orbitals. The algorithm is not therefore confined to iso-electronic elements.

### Effective Core Potentials and Active Spaces

To reduce the size of the Hilbert space, effective core potentials (ECPs) are used to replace core electrons in all atoms heavier than H. The use of ECPs allows us to reduce the number of orbitals (and thus qubits) in the calculations. The Gaussian ECP section used for the different atoms are given in Table SI-3.

In the first test case (see Fig.1 of the main text) we used the lowest atomic orbital (i.e., 2 spin orbitals) for each atom in the molecule. While this choice does not guarantee accurate molecular energies (within the so-called chemical accuracy of 1 kcal/mol) it is nonetheless sufficient to provide the correct ranking for the binding energies. The limitation to just 2 basis functions (atomic spin orbitals) is motivated by hardware constraints.

In the second application (see Fig.2 of the main text) we used 8 atomic spin orbitals per atom. This is possible since in this case we only perform simulations of the ‘alchemical’ quantum algorithm.

Note that in both cases, more accurate results can be achieved using a larger active space (i.e., a larger number of spin orbitals) and better basis sets without changing the nature of the algorithm.

TABLE SI-3. Effective core potentials used to replace the core electrons of the atoms used in our use cases.

| Atom | Effective Core Potentials                                                                                                                                                                     | Atom | Effective Core Potentials                                                                                                                                                                                                                                                                                                                                                                                                                                                                                                 | Atom | Effective Core Potential                                                                                                                                                                     |  |
|------|-----------------------------------------------------------------------------------------------------------------------------------------------------------------------------------------------|------|---------------------------------------------------------------------------------------------------------------------------------------------------------------------------------------------------------------------------------------------------------------------------------------------------------------------------------------------------------------------------------------------------------------------------------------------------------------------------------------------------------------------------|------|----------------------------------------------------------------------------------------------------------------------------------------------------------------------------------------------|--|
|      |                                                                                                                                                                                               | Na   | 0<br>Na-ECP 2 10<br>d-ul potential<br>5<br>1 175.5502590 -10.000<br>2 35.0516791 -47.4902024<br>2 7.9060270 -17.2283007<br>2 2.3365719 -6.0637782<br>2 0.7799867 -0.7299393<br>s-ul potential<br>5<br>0 243.3605846 3.000<br>1 41.5764759 36.2847626<br>2 13.2649167 72.9304880<br>2 3.6797165 23.8401151<br>2 0.9764209 6.0123861<br>p-ul potential<br>6<br>0 1257.2650682 5.000<br>1 189.6248810 117.4495683<br>2 54.5247759 423.3986704<br>2 13.7449955 109.3247297<br>2 3.6813579 31.3701656<br>2 0.9461106 7.1241813 |      |                                                                                                                                                                                              |  |
| Li   | 0<br>LI-ECP 1 2<br>p-ul potential<br>1<br>1 1.3430600 -0.7306300<br>s-ul potential<br>2<br>0 0.6128400 1.8013100<br>2 1.6488100 3.5497100                                                     |      |                                                                                                                                                                                                                                                                                                                                                                                                                                                                                                                           | C    | 0<br>C-ECP 3 2<br>f potential<br>1<br>2 1.00 0.00<br>s-f potential<br>1<br>2 6.401052 33.121638<br>p-f potential<br>1<br>2 7.307747 -1.986257<br>d-f potential<br>1<br>2 5.961796 -9.454318  |  |
| N    | 0<br>N-ECP 3 2<br>f potential<br>1<br>2 1.00 0.00<br>s-f potential<br>1<br>2 7.977232 38.533831<br>p-f potential<br>1<br>2 10.183854 -2.550810<br>d-f potential<br>1<br>2 11.559947 -2.995545 | O    | 0<br>O-ECP 3 2<br>f potential<br>1<br>2 1.00 0.00<br>s-f potential<br>1<br>2 10.445670 50.771069<br>p-f potential<br>1<br>2 18.045174 -4.903551<br>d-f potential<br>1<br>2 8.164798 -3.312124                                                                                                                                                                                                                                                                                                                             | S    | 0<br>S-ECP 3 10<br>f potential<br>1<br>2 1.00 0.00<br>s-f potential<br>1<br>2 3.743892 37.974819<br>p-f potential<br>1<br>2 3.086088 18.790529<br>d-f potential<br>1<br>2 4.862414 -7.837964 |  |

### Protein Force Field

The atomic charges of the H-NOX protein (PDB entry code 3TFA) are generated using the Gromacs *pdb2gmx* code and the *gromos54a7.ff* force field with the SPC water model. The original 3TFA.pdb file is made of two units of the same H-NOX protein. In this study, we used the coordinates of the first monomer only. All test molecules (dimers in Table SI-6) are placed with their center of mass at the position of the first co-crystallized Xe atom (the one closer to the protein surface, see Fig.3a of the main text). For the calculation of the binding, we only consider the protein charges within a sphere of radius 11Å from the position of the Xe atom. This radius is chosen such that the total charge of the atoms included is close to zero ( $q = 0.12$ ) to avoid artifacts introduced by the distance cutoff. The corresponding charges in a.u. can be found in Table SI-4.

TABLE SI-4. Charges used to mimic the enzyme pocket. Here we record only the non-zero charges generated by the protein force field calculation.

| x      | y      | z      | Charge (a.u.) | x      | y      | z      | Charge (a.u.) | x      | y      | z      | Charge (a.u.) |
|--------|--------|--------|---------------|--------|--------|--------|---------------|--------|--------|--------|---------------|
| 7.240  | 21.210 | 77.100 | -0.482        | 8.480  | 21.990 | 78.130 | 0.241         | 9.790  | 14.880 | 76.560 | 0.450         |
| 10.780 | 14.800 | 75.820 | -0.450        | 9.840  | 14.680 | 77.870 | -0.310        | 9.010  | 14.770 | 78.420 | 0.310         |
| 10.600 | 15.870 | 80.470 | 0.290         | 11.160 | 16.820 | 79.940 | -0.450        | 11.600 | 12.940 | 78.080 | 0.450         |
| 12.810 | 12.770 | 77.900 | -0.450        | 10.700 | 11.980 | 77.880 | -0.310        | 9.740  | 12.150 | 78.090 | 0.310         |
| 11.770 | 10.840 | 76.000 | 0.450         | 12.760 | 10.180 | 75.690 | -0.450        | 11.190 | 11.700 | 75.170 | -0.310        |
| 10.390 | 12.220 | 75.470 | 0.310         | 13.090 | 12.550 | 73.840 | 0.450         | 13.960 | 12.200 | 73.040 | -0.450        |
| 13.310 | 13.490 | 74.750 | -0.310        | 12.560 | 13.780 | 75.360 | 0.310         | 15.660 | 13.050 | 75.310 | 0.450         |
| 16.760 | 12.950 | 74.730 | -0.450        | 15.320 | 12.270 | 76.330 | -0.310        | 14.440 | 12.420 | 76.780 | 0.310         |
| 16.470 | 10.220 | 75.670 | 0.450         | 17.620 | 9.820  | 75.440 | -0.450        | 15.420 | 9.850  | 74.960 | -0.310        |
| 14.510 | 10.210 | 75.190 | 0.310         | 16.500 | 9.470  | 72.770 | 0.450         | 17.370 | 8.740  | 72.290 | -0.450        |
| 16.320 | 10.730 | 72.370 | -0.310        | 15.600 | 11.280 | 72.790 | 0.310         | 17.580 | 13.380 | 69.940 | 0.241         |
| 17.110 | 15.060 | 69.500 | -0.482        | 17.750 | 15.940 | 70.930 | 0.241         | 18.640 | 11.350 | 71.760 | 0.450         |
| 19.540 | 10.960 | 71.000 | -0.450        | 18.890 | 11.810 | 72.980 | -0.310        | 18.130 | 12.110 | 73.550 | 0.310         |
| 20.920 | 10.530 | 73.660 | 0.450         | 22.130 | 10.380 | 73.430 | -0.450        | 20.150 | 9.530  | 74.060 | -0.310        |
| 19.170 | 9.680  | 74.220 | 0.310         | 19.310 | 8.150  | 72.200 | 0.310         | 21.020 | 9.610  | 70.530 | 0.310         |
| 20.680 | 10.400 | 67.530 | -0.540        | 20.840 | 13.510 | 68.050 | 0.140         | 19.660 | 12.180 | 66.890 | -0.050        |
| 19.020 | 12.780 | 66.420 | 0.310         | 24.040 | 13.040 | 71.530 | -0.540        | 23.810 | 14.660 | 70.190 | 0.140         |
| 25.750 | 14.070 | 70.610 | -0.050        | 26.300 | 14.700 | 70.070 | 0.310         | 19.290 | 12.100 | 78.880 | -0.140        |
| 19.970 | 12.360 | 78.200 | 0.140         | 17.330 | 11.410 | 80.810 | -0.140        | 16.640 | 11.160 | 81.490 | 0.140         |
| 18.230 | 12.970 | 79.190 | -0.140        | 18.170 | 13.850 | 78.730 | 0.140         | 17.270 | 12.610 | 80.150 | -0.140        |
| 16.530 | 13.250 | 80.360 | 0.140         | 22.100 | 15.200 | 82.480 | 0.450         | 21.770 | 16.250 | 83.030 | -0.450        |
| 13.690 | 12.190 | 81.750 | -0.140        | 14.550 | 12.090 | 81.260 | 0.140         | 14.330 | 13.790 | 82.910 | 0.140         |
| 13.040 | 19.690 | 82.910 | 0.450         | 14.190 | 19.370 | 82.680 | -0.450        | 12.200 | 20.100 | 81.970 | -0.310        |
| 11.270 | 20.360 | 82.230 | 0.310         | 11.360 | 20.450 | 79.680 | 0.266         | 10.370 | 19.450 | 79.930 | -0.674        |
| 9.570  | 19.620 | 79.360 | 0.408         | 13.670 | 21.250 | 80.340 | 0.450         | 14.670 | 20.990 | 79.670 | -0.450        |
| 13.480 | 22.450 | 80.900 | -0.310        | 12.650 | 22.620 | 81.420 | 0.310         | 13.010 | 25.810 | 79.160 | -0.140        |
| 13.910 | 25.700 | 78.750 | 0.140         | 11.970 | 26.320 | 78.410 | -0.140        | 12.130 | 26.590 | 77.460 | 0.140         |
| 15.860 | 23.100 | 81.350 | 0.450         | 16.890 | 23.350 | 80.730 | -0.450        | 15.860 | 22.470 | 82.520 | -0.310        |
| 15.000 | 22.300 | 83.000 | 0.310         | 17.800 | 20.930 | 82.250 | 0.450         | 19.020 | 20.880 | 82.160 | -0.450        |
| 17.000 | 20.050 | 81.640 | -0.310        | 16.010 | 20.090 | 81.800 | 0.310         | 18.230 | 19.670 | 79.530 | 0.450         |
| 19.330 | 19.260 | 79.160 | -0.450        | 17.570 | 20.650 | 78.910 | -0.310        | 16.670 | 20.910 | 79.250 | 0.310         |
| 19.440 | 22.070 | 78.090 | 0.450         | 20.440 | 21.940 | 77.380 | -0.450        | 19.450 | 22.810 | 79.190 | -0.310        |
| 18.610 | 22.910 | 79.720 | 0.310         | 21.820 | 22.540 | 79.900 | 0.450         | 22.930 | 22.750 | 79.420 | -0.450        |
| 21.560 | 21.480 | 80.650 | -0.310        | 20.640 | 21.370 | 81.040 | 0.310         | 23.090 | 19.830 | 79.640 | 0.450         |
| 24.280 | 19.580 | 79.500 | -0.450        | 22.190 | 19.540 | 78.700 | -0.310        | 21.220 | 19.720 | 78.870 | 0.310         |
| 23.490 | 19.940 | 76.660 | 0.450         | 24.470 | 19.540 | 76.040 | -0.450        | 23.150 | 21.220 | 76.710 | -0.310        |
| 22.330 | 21.500 | 77.210 | 0.310         | 23.330 | 23.600 | 76.170 | 0.266         | 24.210 | 24.590 | 75.650 | -0.674        |
| 23.780 | 25.490 | 75.750 | 0.408         | 25.380 | 22.230 | 76.600 | 0.450         | 26.360 | 22.230 | 75.850 | -0.450        |
| 25.490 | 22.220 | 77.920 | -0.310        | 24.670 | 22.180 | 78.490 | 0.310         | 26.100 | 19.860 | 78.910 | 0.310         |
| 27.240 | 18.680 | 75.960 | -0.310        | 26.400 | 19.170 | 76.220 | 0.310         | 27.020 | 22.320 | 72.710 | -0.310        |
| 26.570 | 21.880 | 73.480 | 0.310         | 26.450 | 18.660 | 68.920 | 0.127         | 25.690 | 17.730 | 68.030 | 0.129         |
| 24.950 | 17.300 | 68.560 | 0.248         | 25.290 | 18.250 | 67.270 | 0.248         | 25.230 | 23.900 | 72.270 | 0.450         |
| 24.750 | 23.680 | 73.380 | -0.450        | 22.590 | 25.290 | 72.210 | 0.450         | 22.230 | 24.380 | 71.460 | -0.450        |
| 21.840 | 25.730 | 73.210 | -0.310        | 22.170 | 26.480 | 73.790 | 0.310         | 19.650 | 25.230 | 72.240 | 0.450         |
| 18.960 | 24.270 | 71.900 | -0.450        | 19.690 | 26.360 | 71.550 | -0.310        | 20.290 | 27.100 | 71.860 | 0.310         |
| 20.600 | 29.000 | 71.900 | -0.635        | 19.160 | 25.550 | 69.240 | 0.450         | 18.260 | 25.100 | 68.550 | -0.450        |
| 20.430 | 25.200 | 69.050 | -0.310        | 21.150 | 25.660 | 69.570 | 0.310         | 24.210 | 22.740 | 66.980 | 0.270         |
| 24.620 | 21.570 | 66.790 | -0.635        | 20.150 | 22.820 | 68.500 | 0.450         | 19.650 | 22.060 | 67.660 | -0.450        |
| 20.170 | 22.520 | 69.790 | -0.310        | 20.590 | 23.140 | 70.450 | 0.310         | 18.030 | 21.310 | 70.120 | 0.450         |
| 17.410 | 20.290 | 69.830 | -0.450        | 17.420 | 22.480 | 70.320 | -0.310        | 17.950 | 23.280 | 70.600 | 0.310         |
| 15.560 | 22.290 | 68.690 | 0.450         | 14.590 | 21.590 | 68.450 | -0.450        | 16.330 | 22.810 | 67.730 | -0.310        |
| 17.080 | 23.430 | 67.990 | 0.310         | 16.140 | 21.000 | 66.070 | 0.450         | 15.210 | 20.430 | 65.490 | -0.450        |
| 17.200 | 20.340 | 66.520 | -0.310        | 17.920 | 20.840 | 66.990 | 0.310         | 16.200 | 18.160 | 67.030 | 0.450         |
| 15.660 | 17.180 | 66.510 | -0.450        | 15.820 | 18.630 | 68.200 | -0.310        | 16.270 | 19.430 | 68.590 | 0.310         |
| 13.560 | 16.480 | 71.470 | -0.140        | 14.400 | 15.970 | 71.300 | 0.140         | 12.300 | 18.500 | 71.300 | -0.140        |
| 12.220 | 19.450 | 71.000 | 0.140         | 12.480 | 15.850 | 72.090 | -0.140        | 12.560 | 14.890 | 72.370 | 0.140         |
| 11.210 | 17.880 | 71.920 | -0.140        | 10.370 | 18.400 | 72.080 | 0.140         | 11.300 | 16.550 | 72.320 | -0.140        |
| 10.530 | 16.110 | 72.770 | 0.140         | 13.380 | 18.140 | 68.230 | 0.450         | 12.600 | 17.200 | 68.190 | -0.450        |
| 13.110 | 19.320 | 67.690 | -0.310        | 13.760 | 20.070 | 67.780 | 0.310         | 11.740 | 18.590 | 65.780 | 0.450         |
| 10.680 | 18.040 | 65.500 | -0.450        | 12.840 | 18.390 | 65.080 | -0.310        | 13.680 | 18.890 | 65.310 | 0.310         |
| 12.600 | 16.010 | 64.460 | 0.450         | 13.240 | 15.640 | 65.560 | -0.310        | 13.810 | 16.310 | 66.040 | 0.310         |
| 15.180 | 11.920 | 67.230 | -0.140        | 15.690 | 12.230 | 66.430 | 0.140         | 13.570 | 12.340 | 68.940 | -0.140        |
| 12.930 | 12.950 | 69.400 | 0.140         | 15.380 | 10.640 | 67.720 | -0.140        | 16.040 | 10.040 | 67.280 | 0.140         |
| 13.760 | 11.050 | 69.430 | -0.140        | 13.230 | 10.740 | 70.230 | 0.140         | 14.670 | 10.210 | 68.820 | 0.203         |
| 14.870 | 8.920  | 69.290 | -0.611        | 14.280 | 8.760  | 70.090 | 0.408         | 11.700 | 13.960 | 66.540 | 0.450         |
| 11.010 | 14.960 | 67.070 | -0.310        | 11.420 | 15.870 | 67.070 | 0.310         | 7.840  | 16.080 | 68.860 | -0.210        |
| 8.230  | 14.830 | 71.110 | -0.140        | 9.210  | 14.650 | 70.980 | 0.140         | 7.580  | 14.410 | 72.250 | -0.140        |
| 8.090  | 13.920 | 72.960 | 0.140         | 13.170 | 28.290 | 72.750 | -0.450        | 13.360 | 25.750 | 67.330 | 0.450         |
| 13.620 | 25.100 | 66.320 | -0.450        | 12.630 | 25.260 | 68.330 | -0.310        | 12.490 | 25.800 | 69.160 | 0.310         |
| 10.920 | 22.050 | 69.540 | 0.241         | 10.210 | 21.610 | 71.140 | -0.482        | 8.630  | 22.440 | 71.030 | 0.241         |
| 10.960 | 23.910 | 67.090 | 0.450         | 10.850 | 22.920 | 66.360 | -0.450        |        |        |        |               |

### Reference binding Energies from classical calculations

To validate results of our ‘alchemical’ optimizations, we performed classical quantum chemistry calculations of all possible structures (still affordable due to the limited number of atomic sites and atomic species considered in these proof-of-principle study) using Gaussian.<sup>2</sup> Molecules that would bind in a given point charge environment show negative binding energies. Positive values indicate that the molecules have no affinity for the binding site.

The results for the binding energies are summarized in Tables SI-5 (for the first test system described in Fig. 1 of the main text) and SI-6 (for the second test case in Fig.3) and confirm the correctness of the ‘alchemical’ predictions obtained using the proposed quantum algorithm.

TABLE SI-5. Binding Energies for the different diatomic molecular structures for the three different charges environments calculated in the full active space using Gaussian code.<sup>2</sup> Energies are computed at CCSD level of accuracy.

| Atomic Composition | Binding Energies (mHartree) |                 |                 |
|--------------------|-----------------------------|-----------------|-----------------|
|                    | Case1                       | Case2           | Case 3          |
| H <sub>2</sub>     | -0.62948                    | -1.10845        | -0.41422        |
| HLi                | -4.23166                    | 30.00577        | 1.431840        |
| HNa                | -2.02120                    | 50.65077        | 4.247418        |
| LiH                | -4.23166                    | -39.8559        | -5.59603        |
| Li <sub>2</sub>    | <b>-9.72620</b>             | -33.8006        | -1.43048        |
| LiNa               | -9.32586                    | 31.42160        | 5.535703        |
| NaH                | -2.02120                    | -57.5656        | <b>-6.62025</b> |
| NaLi               | -9.32586                    | <b>-80.7604</b> | -5.98487        |
| Na <sub>2</sub>    | -5.00948                    | -27.1735        | -1.33592        |

TABLE SI-6. Binding energies and Force Field Calculations for diatomic molecular structures within the protein environment. Binding energies are calculated within the full active space with the Gaussian code.<sup>2</sup>The self energy of the charges introduced to mimic the enzyme pocket is -6.3667 a.u. for all cases.

| Atomic Composition | Binding Energies(mHartree) |                |                |
|--------------------|----------------------------|----------------|----------------|
|                    | CCSD                       | B3LYP          | Force Field    |
| CN                 | -0.5479                    | -0.3264        | -0.3745        |
| OC                 | -0.3134                    | -0.0848        | 0.4468         |
| ON                 | -0.4147                    | -0.1971        | 0.1056         |
| SC                 | -0.6329                    | -0.4491        | -0.5136        |
| SN                 | -1.0435                    | -0.8188        | -0.7700        |
| SO                 | <b>-1.1684</b>             | <b>-1.0922</b> | <b>-0.8313</b> |

### Interpretation of the statistical outcome

In the case outcome of the alchemical optimization consists in an ensemble of structures with similar weights, this can be taken as an opportunity since it offers us the possibility to choose from the pool of candidates the structure that fulfills additional conditions that are hard to encode in a cost function such as: stability, possibility of synthesis, and production costs, just to mention a few. After all, in molecular design we are not necessarily interested in the absolute best possible molecule, but we aim at a list of valid candidates to propose for synthesis. On the other hand, if this uncertainty is constituting a problem in future applications, we can also trivially modify our algorithm and include a penalty term in the cost function that penalizes distributions of weights (i.e., the coefficients  $\alpha$ ) with many non-zero terms, e.g., by using L1-regularization very common in classical machine learning. In this case, the outcome of our algorithm will only consist of a small number of ‘optimal’ structures.

### Description of the Quantum Hardware

The calculations are performed using the 20 qubit processor *ibmq\_singapore*. The connectivity of the hardware is shown in Fig. SI-1. For the calculations we used 4 out of the 20 available qubits, namely qubits labelled as 0,1,2 and 3. The operating frequencies of the qubits range from 4.67 to 4.78 GHz and the average coherence and relaxation times of the qubits are about 89.5 and 133  $\mu$ s, respectively.

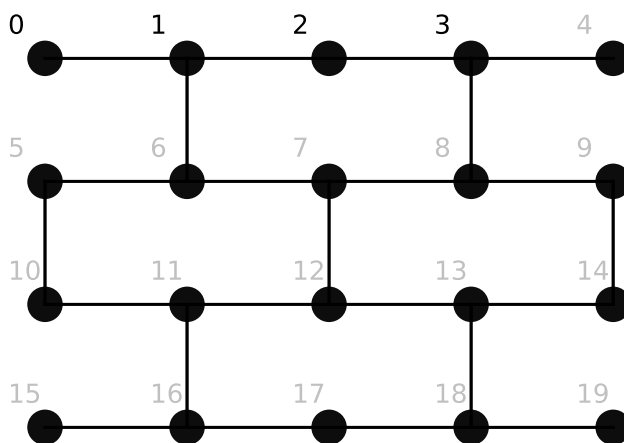

FIG. SI-1. Connectivity of the *ibmq\_singapore* chip. The qubits used are qubits 0,1,2 and 3 with their natural connectivity. Hardware access and data provided via Qiskit<sup>3</sup>

<sup>1</sup> NIST Computational Chemistry Comparison and Benchmark Database; NIST Standard Reference Database Number 101; <http://cccbdb.nist.gov/>.

<sup>2</sup> M. J. Frisch, G. W. Trucks, H. B. Schlegel, G. E. Scuseria, M. A. Robb, J. R. Cheeseman, G. Scalmani, V. Barone, G. A. Petersson, H. Nakatsuji, X. Li, M. Caricato, A. V. Marenich, J. Bloino, B. G. Janesko, R. Gomperts, B. Mennucci, H. P. Hratchian, J. V. Ortiz, A. F. Izmaylov, J. L. Sonnenberg, D. Williams-Young, F. Ding, F. Lipparini, F. Egidi, J. Goings, B. Peng, A. Petrone, T. Henderson, D. Ranasinghe, V. G. Zakrzewski, J. Gao, N. Rega, G. Zheng, W. Liang, M. Hada, M. Ehara, K. Toyota, R. Fukuda, J. Hasegawa, M. Ishida, T. Nakajima, Y. Honda, O. Kitao, H. Nakai, T. Vreven, K. Throssell, J. A. Montgomery, Jr., J. E. Peralta, F. Ogliaro, M. J. Bearpark, J. J. Heyd, E. N. Brothers, K. N. Kudin, V. N. Staroverov, T. A. Keith, R. Kobayashi, J. Normand, K. Raghavachari, A. P. Rendell, J. C. Burant, S. S. Iyengar, J. Tomasi, M. Cossi, J. M. Millam, M. Klene, C. Adamo, R. Cammi, J. W. Ochterski, R. L. Martin, K. Morokuma, O. Farkas, J. B. Foresman, and D. J. Fox, "Gaussian 16 Revision C.01," (2016), gaussian Inc. Wallingford CT.

<sup>3</sup> G. Aleksandrowicz, T. Alexander, P. Barkoutsos, L. Bello, Y. Ben-Haim, D. Bucher, F. J. Cabrera-Hernández, J. Carballo-Franquis, A. Chen, C.-F. Chen, J. M. Chow, A. D. Córcoles-Gonzales, A. J. Cross, A. Cross, J. Cruz-Benito, C. Culver, S. D. L. P. González, E. D. L. Torre, D. Ding, E. Dumitrescu, I. Duran, P. Eendebak, M. Everitt, I. F. Sertage, A. Frisch, A. Fuhrer, J. Gambetta, B. G. Gago, J. Gomez-Mosquera, D. Greenberg, I. Hamamura, V. Havlicek, J. Hellmers, L. Herok, H. Horii, S. Hu, T. Imamichi, T. Itoko, A. Javadi-Abhari, N. Kanazawa, A. Karazeev, K. Krsulich, P. Liu, Y. Luh, Y. Maeng, M. Marques, F. J. Martín-Fernández, D. T. McClure, D. McKay, S. Meesala, A. Mezzacapo, N. Moll, D. M. Rodríguez, G. Nannicini, P. Nation, P. Ollitrault, L. J. O’Riordan, H. Paik, J. Pérez, A. Phan, M. Pistoia, V. Prutyayov, M. Reuter, J. Rice, A. R. Davila, R. H. P. Rudy, M. Ryu, N. Sathaye, C. Schnabel, E. Schoute, K. Setia, Y. Shi, A. Silva, Y. Siraichi, S. Sivarajah, J. A. Smolin, M. Soeken, H. Takahashi, I. Tavernelli, C. Taylor, P. Taylour, K. Trabing, M. Treinish, W. Turner, D. Vogt-Lee, C. Vuillot, J. A. Wildstrom, J. Wilson, E. Winston, C. Wood, S. Wood, S. Wörner, I. Y. Akhalwaya, and C. Zoufal, "Qiskit: An open-source framework for quantum computing" (2019).
